# Supplementary material for: Molecular clustering and percolation characteristics near the glass transition in aqueous trehalose and choline dihydrogen phosphate solutions
Source: Royal Society of Chemistry journal article supplement (doi:10.1039/c8cp03636e), 2018-01-01
Supplement: c8cp03636e1.pdf [file c8cp03636e1.pdf]

**Electronic Supplementary Information:**

**Molecular clustering characteristics in ternary trehalose and choline dihydrogen phosphate solutions**

*Nikita Nikulsin,<sup>a</sup> E. R. Azhagiya Singam,<sup>a‡</sup> Gloria Elliot,<sup>b</sup> and Donald Jacobs<sup>\*a</sup>*

<sup>a</sup>Department of Physics and Optical Science, University of North Carolina at Charlotte, 9201 University City Blvd, Charlotte, NC 28223, USA.

<sup>b</sup>Department of Mechanical Engineering and Engineering Science, University of North Carolina at Charlotte, 9201 University City Blvd, Charlotte, NC 28223, USA.

<sup>‡</sup>Present address: College of Veterinary Medicine, Kansas State University, 1620 Denison Avenue, 228 Coles Hall, Manhattan, KS 66506, USA.

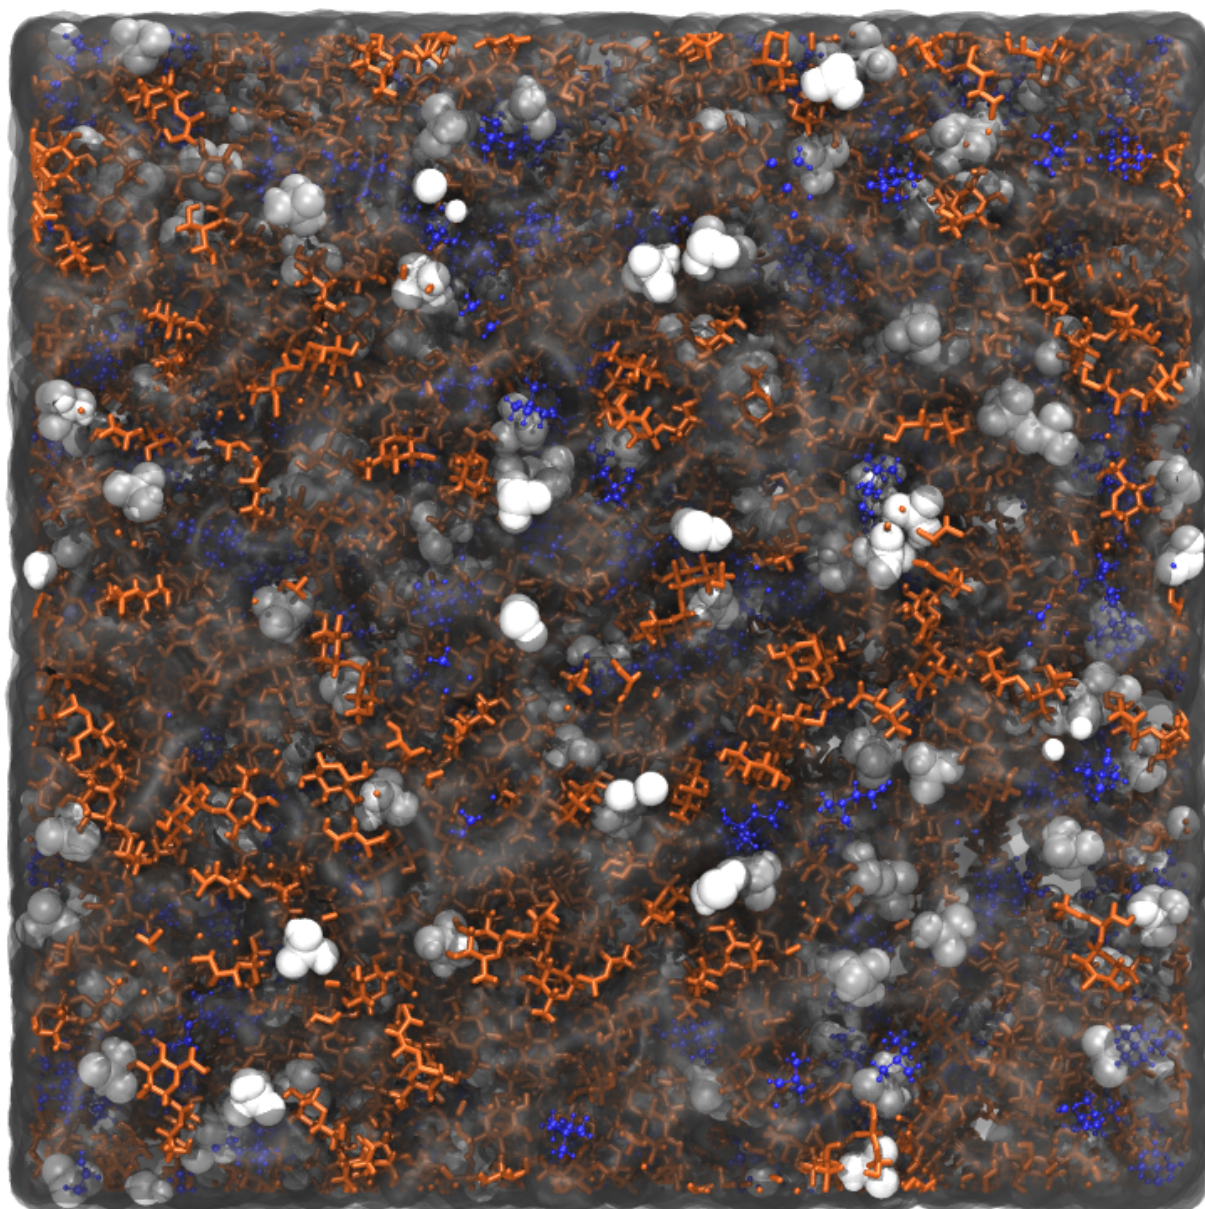

**Figure S1.** A large-scale view of the 50% solute by weight system. The orange molecules are trehalose, blue ions are cholines and white ions are dihydrogen phosphates. Water is represented by the translucent fluid in the figure.

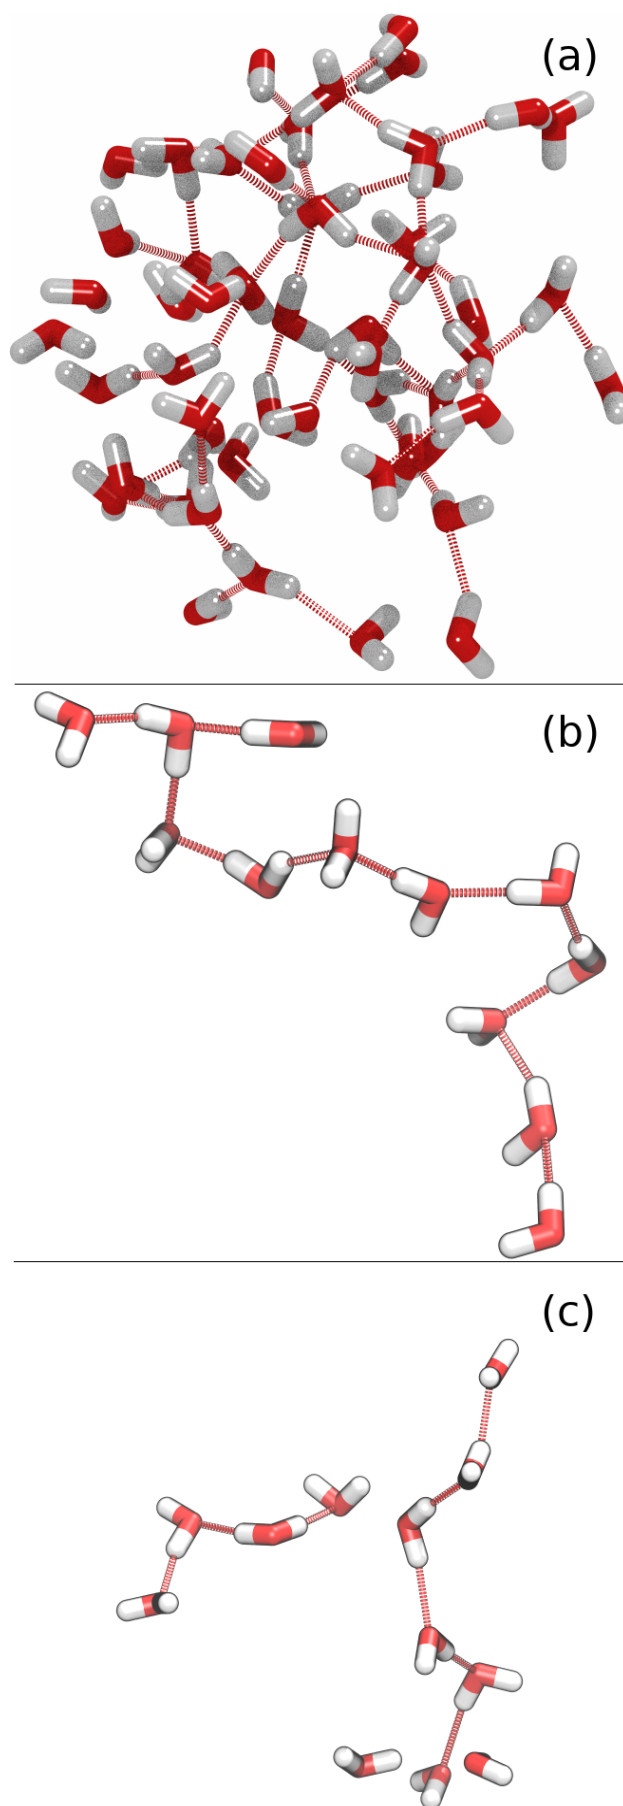

**Figure S2.** A section of a large cluster in the 50% system (a), and two clusters of comparable size in the (b) 83% system, and (c) 95% system. The dotted lines represent hydrogen bonds.

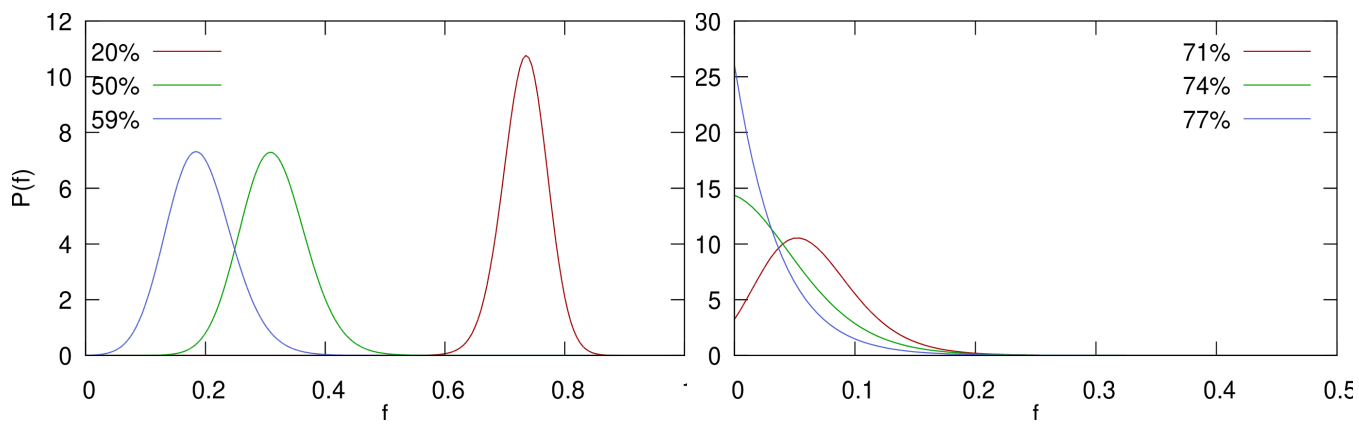

**Figure S3.** Probability distribution functions  $P(f)$  of fractions of time  $f$  that a particular choline ion spends being fully solvated.

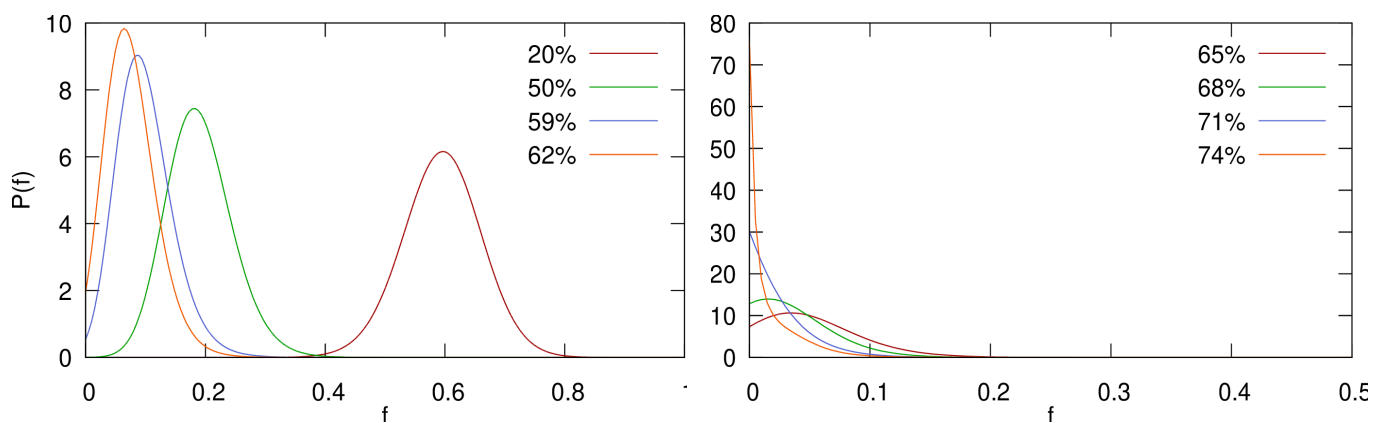

**Figure S4.** Probability distribution functions  $P(f)$  of fractions of time  $f$  that a particular phosphate ion spends being fully solvated.

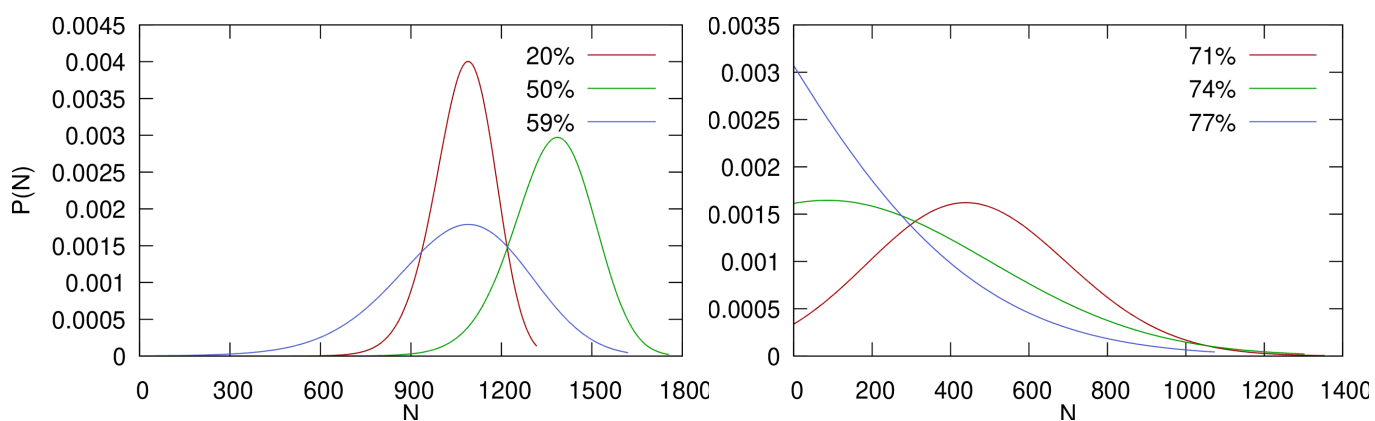

**Figure S5.** Probability distribution functions  $P(N)$  of the numbers of times  $N$  that a particular choline ion switches its category from fully solvated to interfacial and vice versa.

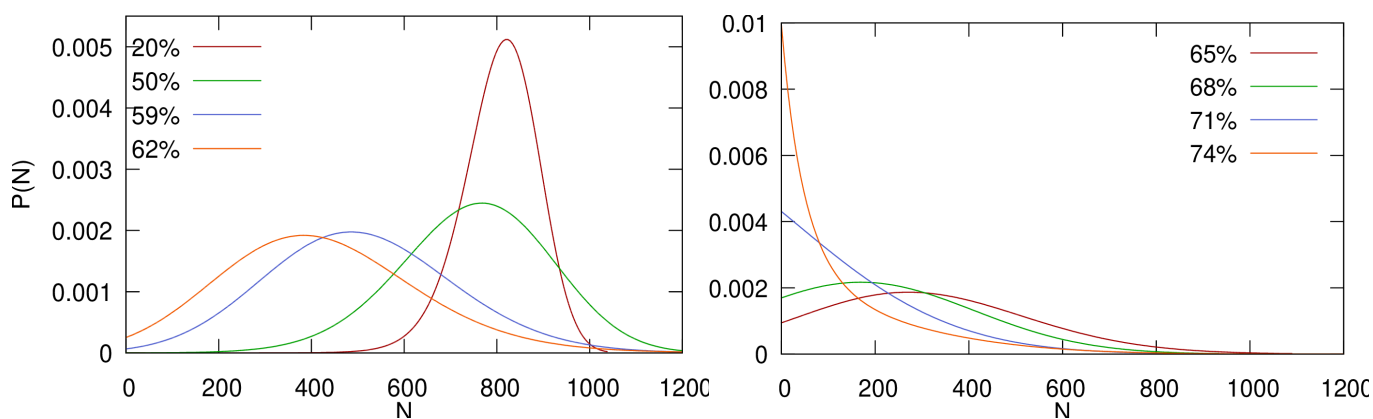

**Figure S6.** Probability distribution functions  $P(N)$  of the numbers of times  $N$  that a particular phosphate ion switches its category from fully solvated to interfacial and vice versa.

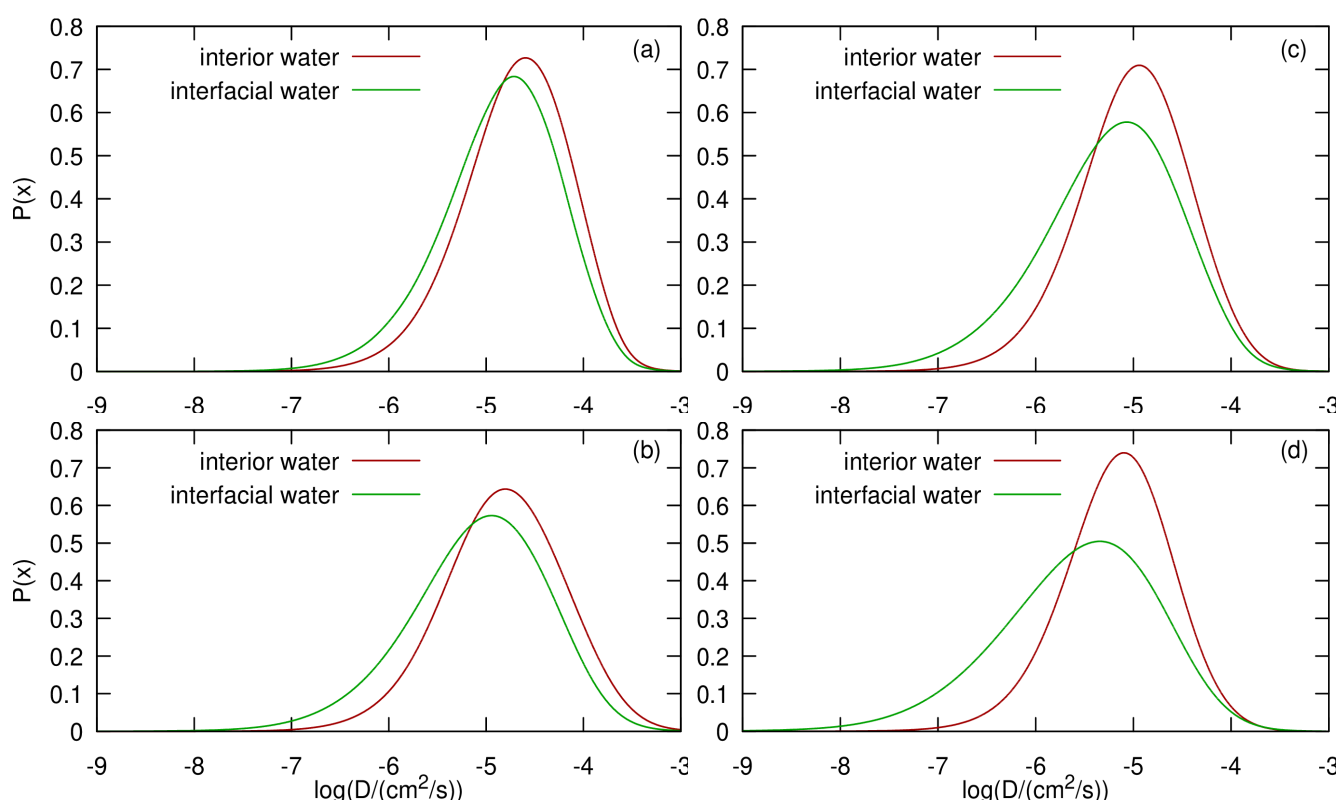

**Figure S7.** Probability distribution functions  $P(x)$  of the logarithms  $x = \log(D/(\text{cm}^2/\text{s}))$  of all recorded diffusivities of interior or interfacial water molecule instances in (a) 71% system, (b) 81.5% system, (c) 83% system and (d) 89% system.

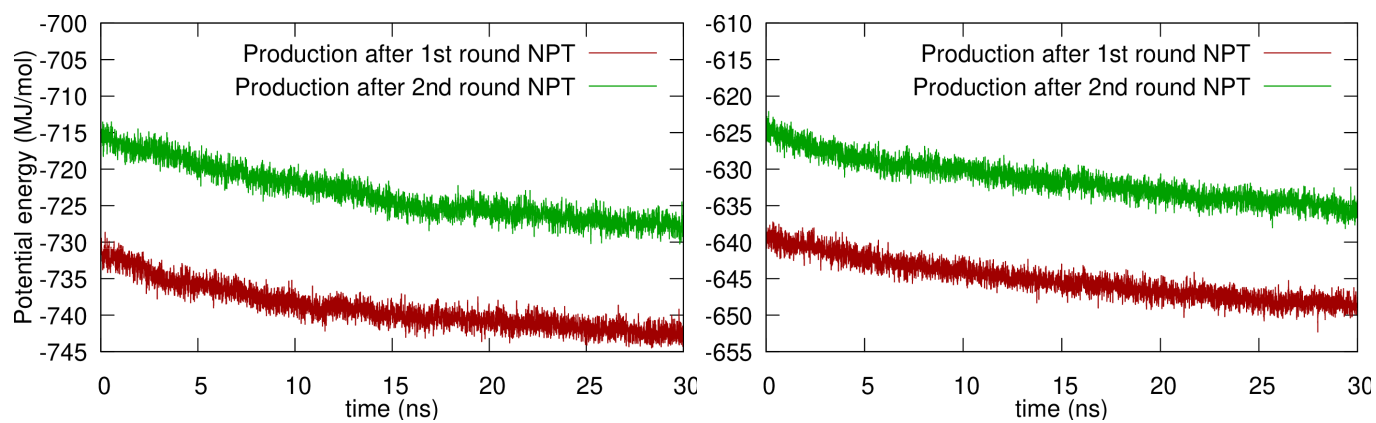

**Figure S8.** Potential energies as functions of time for production runs of the (a) 95% systems and (b) 100% systems.
